# Supplementary material for: Bacterial community structure and effects of picornavirus infection on the anterior nares microbiome in early childhood
Source: PubMed Central journal article supplement (PMC6322332; doi:10.1186/s12866-018-1372-8), 2019-01-07
Supplement: 12866_2018_1372_MOESM1_ESM.pdf [file 12866_2018_1372_MOESM1_ESM.pdf]

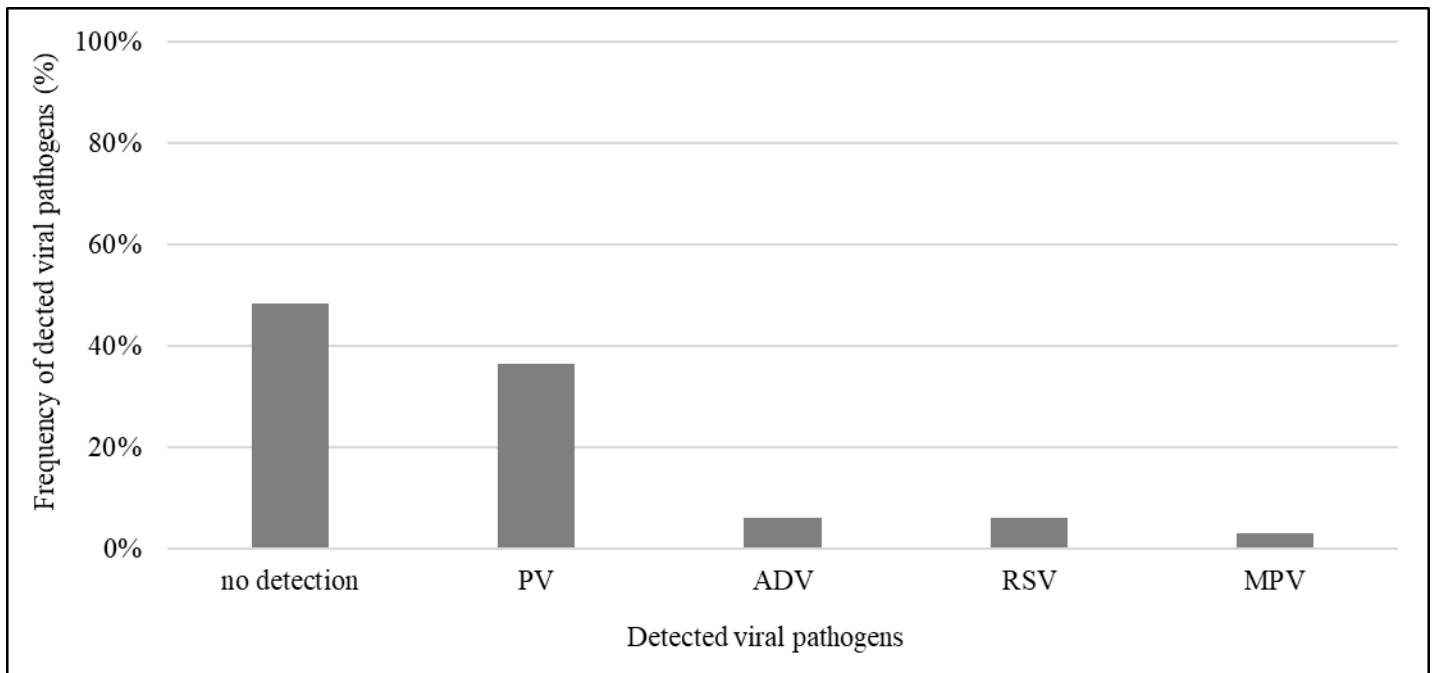

**Figure S1. Frequency of detected viral pathogens.**

We included 30 samples tested for six different viral pathogens. In twelve samples picornavirus was detected (PV, 36%), in two samples adenovirus (ADV, 6%), in two samples respiratory syncytial virus (RSV, 6%), and in one sample metapneumovirus (MPV, 3%). In 16 samples none of the six viral pathogens could be detected (no detection, 48%). Influenza A or B virus was not found.
