# Supplementary material for: Bacterial community structure and effects of picornavirus infection on the anterior nares microbiome in early childhood
Source: PubMed Central journal article supplement (PMC6322332; doi:10.1186/s12866-018-1372-8), 2019-01-07
Supplement: 12866_2018_1372_MOESM2_ESM.pdf [file 12866_2018_1372_MOESM2_ESM.pdf]

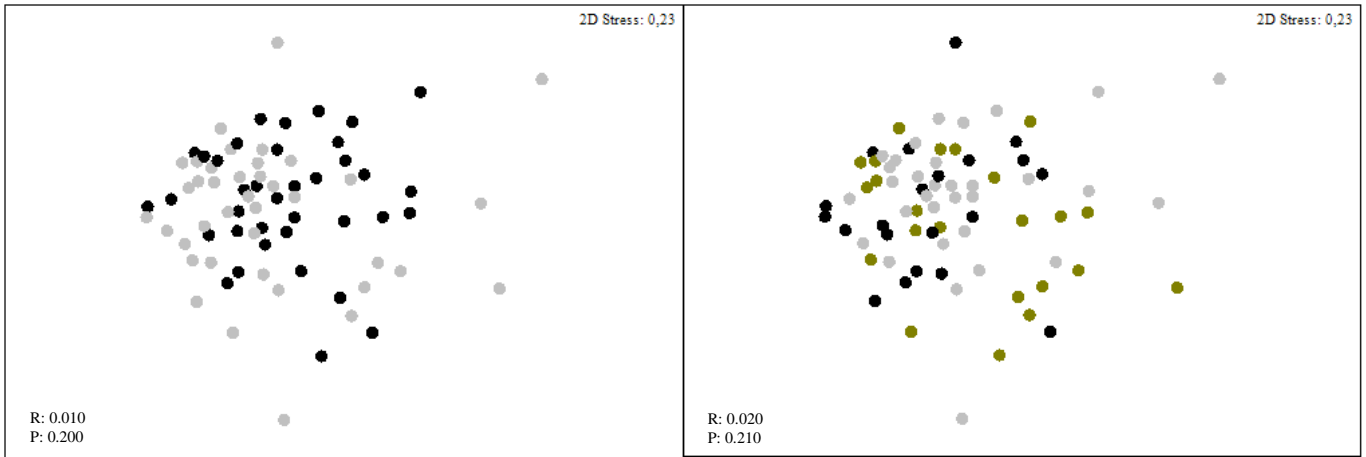

**Figure S2. Non-metric multidimensional scaling (nMDS) plot comparing the global bacterial community structure of the anterior nares by season and age across 26 children providing 76 samples.**

Community structures across 26 children with 39 samples taken during winter season (●) and 37 samples during spring season (●) (left); Community structures across 26 children with samples taken at 13 to 19 months of age ((●) n=22), 20 to 29 ((●) n=23), and 30 to 36 months of age at collection day ((●) n=31) (right); One-way Analysis of similarities (ANOSIM) with 999 permutations was calculated with corresponding Global-R statistics and P-value to assess similarity between bacterial profiles (see inset); Analyses were performed with PRIMER v6 software.
