# Supplementary material for: Bacterial community structure and effects of picornavirus infection on the anterior nares microbiome in early childhood
Source: PubMed Central journal article supplement (PMC6322332; doi:10.1186/s12866-018-1372-8), 2019-01-07
Supplement: 12866_2018_1372_MOESM3_ESM.pdf [file 12866_2018_1372_MOESM3_ESM.pdf]

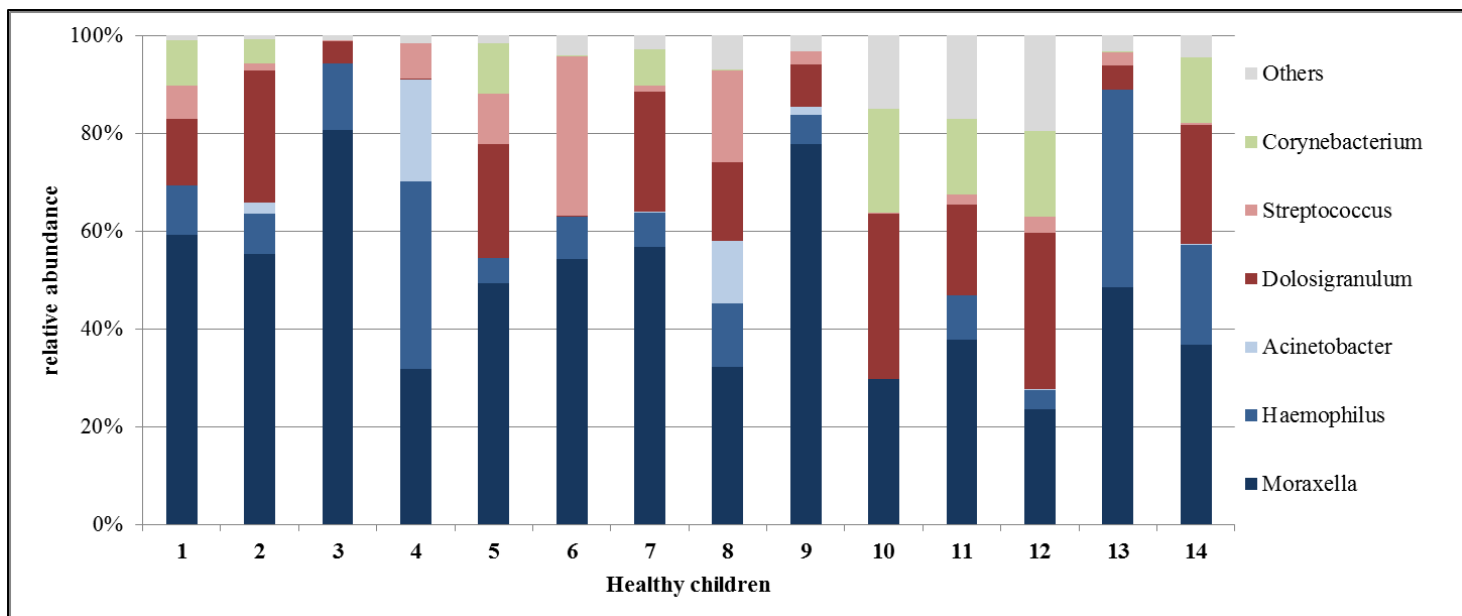

**Figure S3. Average relative abundance of selected genera in the anterior nares' bacterial community over three different collection days of nasal swabs across 14 healthy children.**

Bacterial community structure in 14 healthy children, who displayed no symptoms of respiratory infection on any of the three collection days of nasal swabs; Bacteria with an average relative abundance below 1% and unclassified bacteria were summarized as "Others".
