# Supplementary material for: Bacterial community structure and effects of picornavirus infection on the anterior nares microbiome in early childhood
Source: PubMed Central journal article supplement (PMC6322332; doi:10.1186/s12866-018-1372-8), 2019-01-07
Supplement: 12866_2018_1372_MOESM4_ESM.pdf [file 12866_2018_1372_MOESM4_ESM.pdf]

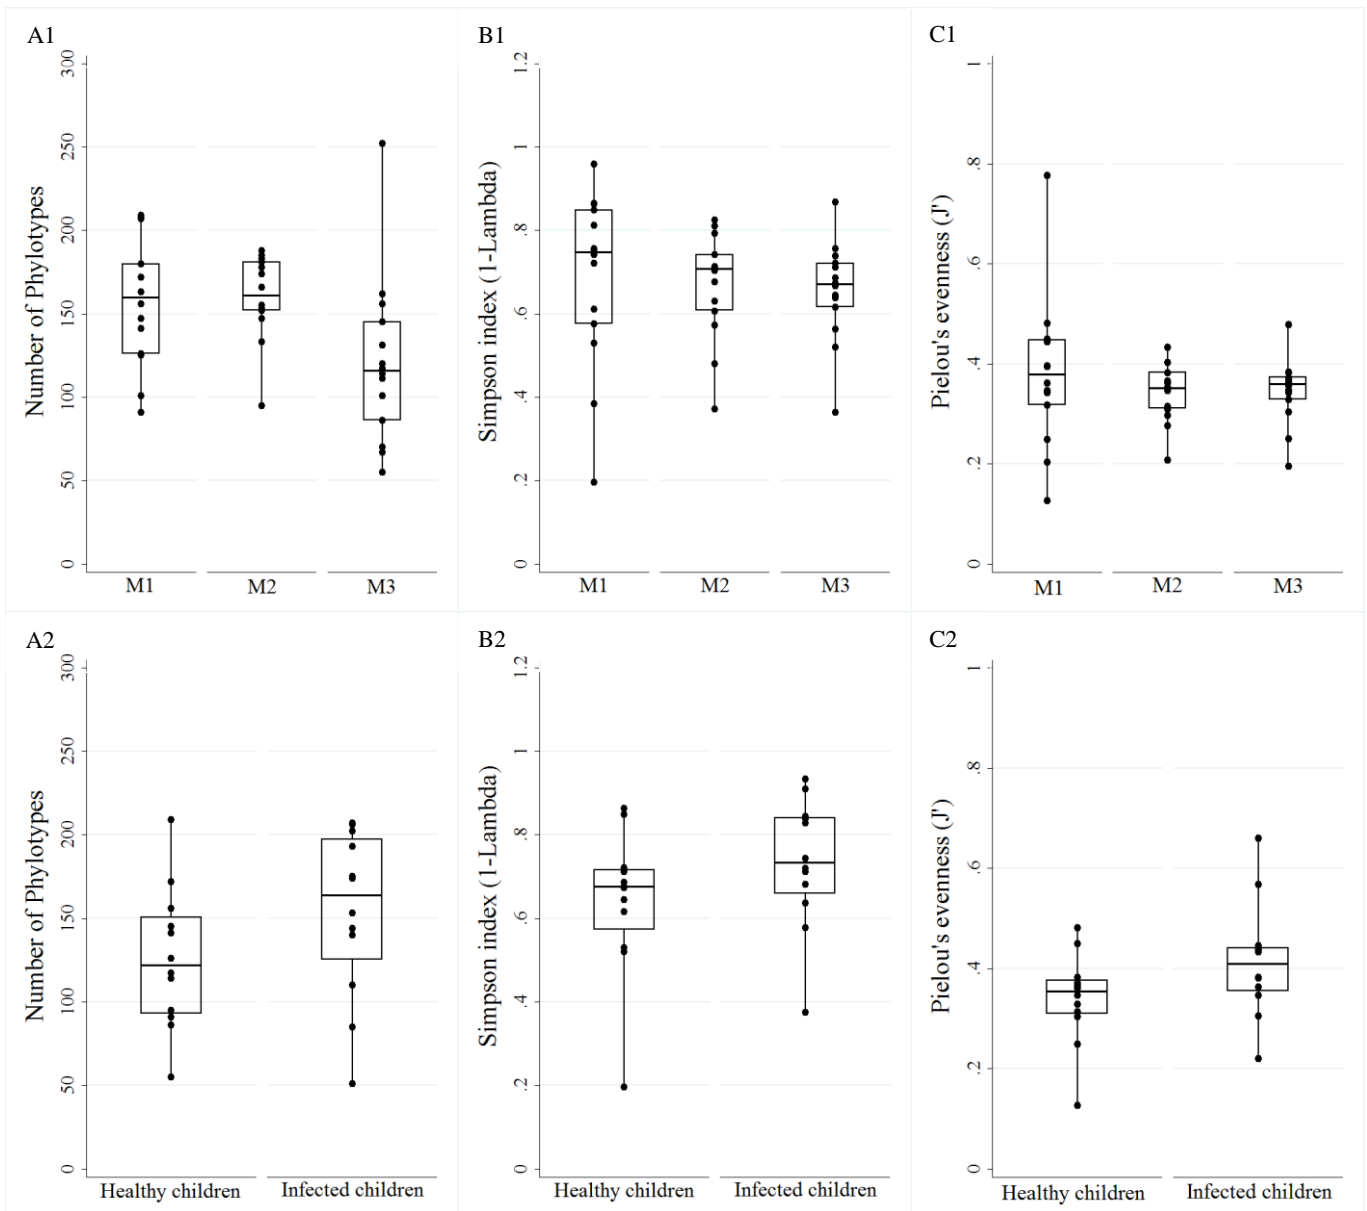

**Figure S4. Anterior nares' community diversity indicated by total phylotype number, Simpson index (1-Lambda), and Pielou's evenness (J').**

A1 to C1: in samples of 14 healthy children collected at three days roughly one month apart (M1 (n=14), M2 (n=14), and M3 (n=14)); A2 to C2: in samples of twelve children infected with picornavirus ("infected children") and of twelve healthy children; A1 and A2: total number of phylotypes per child; B1 and B2: diversity calculated by Simpson index (1-Lambda); C1 and C2: comparison of the evenness calculated by Pielou's evenness (J'); Values of each child are represented as one dot; Calculation was based on phylotype level using PRIMER v6 software.
