# Supplementary material for: Bacterial community structure and effects of picornavirus infection on the anterior nares microbiome in early childhood
Source: PubMed Central journal article supplement (PMC6322332; doi:10.1186/s12866-018-1372-8), 2019-01-07
Supplement: 12866_2018_1372_MOESM5_ESM.pdf [file 12866_2018_1372_MOESM5_ESM.pdf]

**Table S1. Comparison of within-subject and between-subject average similarity percentage of the anterior nares' bacterial profiles across 14 healthy children.**

| Child   | Average similarity percentage <sup>1</sup> |                              | P-Value <sup>4</sup> |
|---------|--------------------------------------------|------------------------------|----------------------|
|         | Within-subject <sup>2</sup>                | Between-subject <sup>3</sup> |                      |
| 1       | 33.70                                      | 26.75                        | 0.459                |
| 2       | 49.30                                      | 27.22                        | 0.009                |
| 3       | 45.80                                      | 16.68                        | 0.009                |
| 4       | 16.10                                      | 14.22                        | 0.545                |
| 5       | 54.80                                      | 28.39                        | 0.009                |
| 6       | 34.60                                      | 19.69                        | 0.009                |
| 7       | 41.80                                      | 27.55                        | 0.019                |
| 8       | 11.90                                      | 16.26                        | 0.009                |
| 9       | 48.30                                      | 24.75                        | 0.009                |
| 10      | 63.40                                      | 25.45                        | 0.009                |
| 11      | 37.50                                      | 26.08                        | 0.009                |
| 12      | 19.00                                      | 21.15                        | 0.382                |
| 13      | 24.00                                      | 21.07                        | 0.201                |
| 14      | 40.50                                      | 22.46                        | 0.069                |
| Overall | 37.19                                      | 22.69                        | 0.015                |

<sup>1</sup>Calculation was based on PRIMER v6 software using Bray-Curtis similarity algorithm with square root transformation on phylotype level.

<sup>2</sup>Average similarity percentages within-subjects were calculated between bacterial profiles on three different collection days (roughly one month apart) for each child separately.

<sup>3</sup>Average similarity percentages between-subjects for each child were based on measurements of pairwise comparisons between all 14 children.

<sup>4</sup>P-values were calculated based on a Mann-Whitney-U-Test
