# Supplementary material for: Bacterial community structure and effects of picornavirus infection on the anterior nares microbiome in early childhood
Source: PubMed Central journal article supplement (PMC6322332; doi:10.1186/s12866-018-1372-8), 2019-01-07
Supplement: 12866_2018_1372_MOESM6_ESM.pdf [file 12866_2018_1372_MOESM6_ESM.pdf]

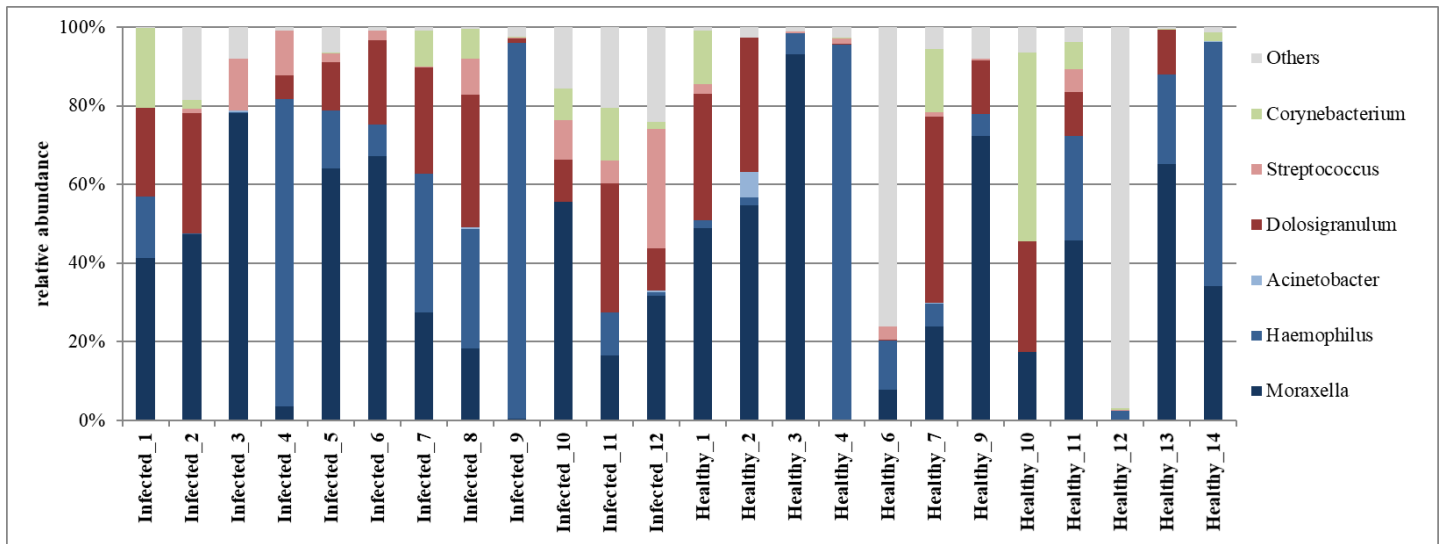

**Figure S5. Relative abundance of selected genera in the anterior nares bacterial community of twelve healthy children and twelve additional children infected with picornavirus (PV).**

Infected\_1 to Infected\_12: relative abundance of twelve infected children with PV; Healthy\_1 to Healthy\_14: relative abundance of 14 healthy children; Samples of healthy children were selected randomly out of the 42 samples (with maximum of one sample per child); Bacteria with an average relative abundance below 1% and unclassified bacteria were summarized as “Others”.
