# Supplementary material for: Bacterial community structure and effects of picornavirus infection on the anterior nares microbiome in early childhood
Source: PubMed Central journal article supplement (PMC6322332; doi:10.1186/s12866-018-1372-8), 2019-01-07
Supplement: 12866_2018_1372_MOESM10_ESM.pdf [file 12866_2018_1372_MOESM10_ESM.pdf]

**Table S2. Seasonal mean air temperature in Lower Saxony for winter and spring between 2010 and 2016**  
(source: Climate Data Centers (CDC) of the Deutsche Wetterdienst (DWD), [www.dwd.de](http://www.dwd.de))

| <b>Year</b> | <b>Mean temperature in degree Celsius</b> |               |
|-------------|-------------------------------------------|---------------|
|             | <b>Winter</b>                             | <b>Spring</b> |
| 2010        | -0.9                                      | 8             |
| 2011        | 0.1                                       | 10.1          |
| 2012        | 2.4                                       | 9.9           |
| 2013        | 1.2                                       | 6.6           |
| 2014        | 4.3                                       | 10.4          |
| 2015        | 2.9                                       | 8.5           |
| 2016        | 4.4                                       | 8.9           |
